# Supplementary material
Source: PubMed Central journal article supplement (PMC4956602)
Supplement: NIHMS731953-supplement-1.pdf [file NIHMS731953-supplement-1.pdf]

**Supplementary Table 1.** Baseline characteristics comparing African-American treatment naïve participants to other African-American participants.

|                                                                   | <b>Treatment naïve participants</b> | <b>Other participants</b> | <b>p-value</b> |
|-------------------------------------------------------------------|-------------------------------------|---------------------------|----------------|
| Sample size (n,%)                                                 | 1,131 (9.0)                         | 11,389 (91.0)             |                |
| <b>AT BASELINE</b>                                                |                                     |                           |                |
| <b>Treatment groups:</b>                                          |                                     |                           | 0.57           |
| Chlorthalidone                                                    | 412 (36.4)                          | 4,068 (35.7)              |                |
| Lisinopril                                                        | 240 (21.2)                          | 2,405 (21.1)              |                |
| Amlodipine                                                        | 225 (19.9)                          | 2,465 (21.6)              |                |
| Doxazosin                                                         | 254 (22.5)                          | 2,451 (21.5)              |                |
| Age, mean (SD)                                                    | 65.7 (8.2)                          | 66.2 (7.7)                | <b>0.04</b>    |
| Women, n (%)                                                      | 557 (49.6)                          | 6,283 (55.2)              | <b>0.0001</b>  |
| SBP in mmHg, mean (SD)                                            | 157.1 (12.8)                        | 145.2 (15.8)              | <b>0.0001</b>  |
| DBP in mmHg, mean (SD)                                            | 90.0 (9.6)                          | 84.2 (10.1)               | <b>0.0001</b>  |
| <b>Eligibility risk factors:</b>                                  |                                     |                           |                |
| BMI, mean (SD), kg/m <sup>2</sup>                                 | 29.4 (6.5)                          | 30.5 (6.8)                | <b>0.0001</b>  |
| Type 2 diabetes, n (%)                                            | 310 (27.4)                          | 4,608 (40.5)              | <b>0.0001</b>  |
| Current cigarette smoker, n (%)                                   | 409 (36.2)                          | 2,762 (24.3)              | <b>0.0001</b>  |
| HDL cholesterol <35 mg/dL, n (%)                                  | 46 (4.1)                            | 729 (6.4)                 | <b>0.002</b>   |
| LVH by electrocardiogram, n (%)                                   | 322 (28.5)                          | 2,750 (24.2)              | <b>0.001</b>   |
| Fasting glucose, mg/dL                                            | 121.7 (63.9)                        | 127.0 (63.5)              | <b>0.03</b>    |
| Total cholesterol, mg/dL                                          | 217.7 (46.5)                        | 216.9 (43.8)              | 0.60           |
| HDL cholesterol, mg/dL                                            | 52.4 (16.0)                         | 51.7 (15.6)               | 0.13           |
| LDL cholesterol, mg/dL                                            | 139.7 (41.8)                        | 138.6 (39.5)              | 0.39           |
| Fasting triglyceride, mg/dL                                       | 126.0 (94.9)                        | 131.0 (89.4)              | 0.13           |
| Glomerular filtration rate, mean (SD), mL/min/1.73 m <sup>2</sup> | 85.3 (21.4)                         | 82.5 (21.7)               | <b>0.0001</b>  |
| <b>AT 6 MONTH VISIT</b>                                           |                                     |                           |                |
| SBP in mmHg, mean (SD)                                            | 139.9 (18.2)                        | 142.3 (18.2)              | <b>0.0001</b>  |
| DBP in mmHg, mean (SD)                                            | 82.1 (10.7)                         | 82.3 (10.4)               | 0.52           |

SBP, systolic blood pressure; DBP, diastolic blood pressure; BMI, body mass index; LVH, left ventricular hypertrophy.

\*test of differences between treatment groups: t-test for continuous variables, chi-square for categorical variables.
