# Supplementary material
Source: PubMed Central journal article supplement (PMC4956602)
Supplement: NIHMS731953-supplement-2.pdf [file NIHMS731953-supplement-2.pdf]

**Supplementary Table 2. Minor allele frequency of 57 SNPs of genes implicated in cardiovascular disease**

| Name                                                                | Gene          | SNP       | Alleles * | MAF   |
|---------------------------------------------------------------------|---------------|-----------|-----------|-------|
| Angiotensin I-Converting Enzyme                                     | <i>ACE</i>    | rs4343    | A/G       | 25.0% |
|                                                                     |               | rs4291    | A/T       | 36.3% |
|                                                                     |               | rs4363    | A/G       | 41.1% |
| Alpha Adducin                                                       | <i>ADD1</i>   | rs4961    | G/T       | 8.1%  |
| Beta-2-Adrenergic Receptor                                          | <i>ADRB2</i>  | rs1042714 | C/G       | 20.2% |
|                                                                     |               | rs1042713 | G/A       | 48.6% |
| Angiotensinogen                                                     | <i>AGT</i>    | rs5050    | A/C       | 15.3% |
|                                                                     |               | rs5051    | A/G       | 16.5% |
|                                                                     |               | rs699     | C/T       | 17.6% |
| Angiotensin Receptor I                                              | <i>AGTR1</i>  | rs5186    | A/C       | 9.9%  |
|                                                                     |               | rs275653  | A/G       | 24.3% |
| Apolipoprotein B                                                    | <i>APOB</i>   | rs676210  | C/T       | 16.0% |
|                                                                     |               | rs1042031 | G/A       | 16.4% |
| Coagulation Factor VII                                              | <i>F7</i>     | rs6046    | G/A       | 11.9% |
|                                                                     |               | rs7981123 | G/T       | 16.0% |
|                                                                     |               | rs762637  | G/A       | 29.0% |
|                                                                     |               | rs5742910 | -/Ins     | 29.6% |
| Coagulation Factor XII                                              | <i>F12</i>    | rs1801020 | C/T       | 43.3% |
| Coagulation Factor XIII, A1 Subunit                                 | <i>F13</i>    | rs5982    | C/T       | 17.3% |
|                                                                     |               | rs5985    | C/T       | 18.6% |
| Fibrinogen, B Beta Polypeptide                                      | <i>FGB</i>    | rs1800790 | G/A       | 6.4%  |
| Guanine Nucleotide-Binding Protein, Alpha-Stimulating Polypeptide 1 | <i>GNAS</i>   | rs7121    | T/C       | 26.6% |
| Guanine Nucleotide-Binding Protein, BETA-3                          | <i>GNB3</i>   | rs5443    | C/T       | 27.9% |
| Platelet Glycoprotein Ib (Alpha Polypeptide)                        | <i>GP1BA</i>  | rs4069688 | G/T       | 17.7% |
|                                                                     |               | rs2243093 | T/C       | 22.1% |
|                                                                     |               | rs6065    | C/T       | 22.2% |
| G Protein-Dependent Receptor Kinase 4                               | <i>GPRK2L</i> | rs1129292 | C/T       | 15.5% |
|                                                                     |               | rs1024323 | C/T       | 44.6% |
|                                                                     |               | rs2960306 | G/T       | 47.8% |
| Integrin, Alpha-2                                                   | <i>ITGA2</i>  | rs1062535 | G/A       | 33.4% |
| Integrin, Beta-3                                                    | <i>ITGB3</i>  | rs5918    | T/C       | 10.1% |
| Lymphotoxin-Alpha                                                   | <i>LTA</i>    | rs1041981 | C/A       | 49.0% |
| Matrix Metalloproteinase 1                                          | <i>MMP1</i>   | rs1799750 | 2G/1G     | 48.5% |
| Matrix Metalloproteinase 12                                         | <i>MMP12</i>  | rs652438  | A/G       | 16.9% |
| Matrix Metalloproteinase 2                                          | <i>MMP2</i>   | rs243865  | C/T       | 6.2%  |
| Matrix Metalloproteinase 3                                          | <i>MMP3</i>   | rs3025058 | 5A/6A     | 11.8% |
| Matrix Metalloproteinase 9                                          | <i>MMP9</i>   | rs2274756 | G/A       | 17.4% |
|                                                                     |               | rs2664538 | A/G       | 33.5% |
| Methylenetetrahydrofolate Reductase                                 | <i>MTHFR</i>  | rs1801131 | A/C       | 12.4% |
| Nitric Oxide Synthase 3                                             | <i>NOS3</i>   | rs1799983 | G/T       | 12.1% |
|                                                                     |               | rs1800779 | A/G       | 15.8% |

|                                                    |               |                   |              |              |
|----------------------------------------------------|---------------|-------------------|--------------|--------------|
| Natriuretic Peptide Precursor A                    | <i>NPPA</i>   | <b>rs5063</b>     | G/A          | <b>5.4%</b>  |
|                                                    |               | <b>rs5065</b>     | T/C          | <b>39.5%</b> |
| Plasminogen Activator Inhibitor 1                  | <i>PAII</i>   | <b>rs1799768</b>  | <b>-/Ins</b> | <b>27.3%</b> |
|                                                    |               | <b>rs7242</b>     | T/G          | <b>47.7%</b> |
| Phosphodiesterase 4D                               | <i>PDE4D</i>  | <b>rs12188950</b> | G/A          | <b>9.6%</b>  |
|                                                    |               | <b>rs40512</b>    | A/G          | <b>15.5%</b> |
|                                                    |               | <b>rs27653</b>    | C/A          | <b>29.9%</b> |
|                                                    |               | <b>rs456009</b>   | C/T          | <b>30.1%</b> |
|                                                    |               | <b>rs27727</b>    | A/G          | <b>36.6%</b> |
|                                                    |               | <b>rs702553</b>   | T/A          | <b>44.1%</b> |
| Paraoxonase I                                      | <i>PONI</i>   | <b>rs705379</b>   | C/T          | <b>17.1%</b> |
| Renin                                              | <i>REN</i>    | <b>rs6681776</b>  | G/A          | <b>19.5%</b> |
|                                                    |               | <b>rs2368564</b>  | C/T          | <b>36.1%</b> |
| Sodium Channel, Non-voltage-Gated 1, Alpha Subunit | <i>SCNNIA</i> | <b>rs2228576</b>  | G/A          | <b>9.1%</b>  |
| Tumor Necrosis Factor                              | <i>TNF</i>    | <b>rs673</b>      | G/A          | <b>5.2%</b>  |
|                                                    |               | <b>rs1800629</b>  | G/A          | <b>12.7%</b> |

MAF, minor allele frequency; \*, minor alleles are bold and on the right.
