# Supplementary material
Source: PubMed Central journal article supplement (PMC4956602)
Supplement: NIHMS731953-supplement-3.pdf [file NIHMS731953-supplement-3.pdf]

**Supplemental Table 3A.** Pharmacogenetic effects of 57 variants to systolic blood pressure response comparing lisinopril vs. chlorthalidone.

| Gene  | SNP       | Intercept     |               |        | SNP           |        | Drug*SNP      |             |
|-------|-----------|---------------|---------------|--------|---------------|--------|---------------|-------------|
|       |           | $\beta$ coef. | $\beta$ coef. | p-val. | $\beta$ coef. | p-val. | $\beta$ coef. | p-val.      |
| ACE   | rs4363    | -20.01        | 4.85          | 0.03   | -0.02         | 0.99   | -0.85         | 0.69        |
|       | rs4291    | -20.57        | 3.95          | 0.06   | 0.79          | 0.522  | 0.53          | 0.80        |
|       | rs4343    | -20.05        | 6.22          | 0.001  | 0.06          | 0.967  | -3.97         | 0.10        |
| ADD1  | rs4961    | -20.25        | 4.27          | 0.007  | 2.85          | 0.248  | -1.44         | 0.71        |
| ADRB2 | rs1042713 | -19.75        | 4.07          | 0.105  | -0.07         | 0.959  | 0.01          | 0.99        |
|       | rs1042714 | -19.26        | 3.16          | 0.079  | -1.56         | 0.346  | 2.49          | 0.32        |
| AGT   | rs5050    | -19.96        | 4.46          | 0.008  | -0.29         | 0.862  | -0.86         | 0.76        |
|       | rs5051    | -19.10        | 2.25          | 0.195  | -2.37         | 0.133  | 5.38          | <b>0.04</b> |
|       | rs699     | -19.17        | 2.76          | 0.115  | -1.43         | 0.354  | 3.75          | 0.15        |
| AGTRI | rs5186    | -19.46        | 4.06          | 0.012  | -1.85         | 0.406  | 0.41          | 0.90        |
|       | rs275653  | -22.70        | 8.39          | 0.034  | 1.82          | 0.206  | -2.82         | 0.25        |
| APOB  | rs676210  | -20.67        | 4.45          | 0.009  | 1.15          | 0.5    | -0.29         | 0.92        |
|       | rs1042031 | -22.23        | 5.29          | 0.266  | 1.30          | 0.462  | -0.62         | 0.82        |
| F7    | rs6046    | -20.74        | -1.54         | 0.793  | 0.54          | 0.757  | 2.92          | 0.36        |
|       | rs5742910 | -21.78        | 4.00          | 0.037  | 3.30          | 0.017  | 0.34          | 0.88        |
|       | rs7981123 | -21.77        | 4.19          | 0.029  | 3.04          | 0.032  | 0.08          | 0.97        |
|       | rs762637  | -20.91        | 6.24          | 0.0002 | 2.62          | 0.11   | -6.55         | <b>0.02</b> |
| F12   | rs1801020 | -20.04        | 3.56          | 0.128  | 0.03          | 0.983  | 0.66          | 0.76        |
| F13   | rs5982    | -19.41        | 3.05          | 0.073  | -2.13         | 0.203  | 4.14          | 0.12        |
|       | rs5985    | -20.36        | 4.78          | 0.006  | 0.98          | 0.556  | -2.26         | 0.40        |
| FGB   | rs1800790 | -20.92        | 9.65          | 0.244  | 0.59          | 0.832  | -2.97         | 0.49        |
| GNAS  | rs7121    | -19.61        | 4.33          | 0.246  | -0.11         | 0.937  | -0.16         | 0.95        |
| GNB3  | rs5443    | -18.80        | 0.42          | 0.906  | -0.72         | 0.609  | 2.57          | 0.27        |
|       | rs6065    | -20.94        | 4.25          | 0.021  | 2.03          | 0.184  | -0.54         | 0.83        |
|       | rs4069688 | -19.33        | 4.20          | 0.014  | -1.90         | 0.255  | -0.24         | 0.93        |
| GPIBA | rs2243093 | -19.16        | 6.60          | 0.107  | -0.55         | 0.721  | -1.55         | 0.53        |
|       | rs1024323 | -21.67        | 3.71          | 0.157  | 1.75          | 0.163  | 0.27          | 0.89        |
|       | rs1129292 | -20.08        | 4.75          | 0.006  | 0.31          | 0.86   | -1.47         | 0.59        |
|       | rs2960306 | -20.08        | 3.29          | 0.18   | -0.02         | 0.989  | 1.01          | 0.62        |
| ITGA2 | rs1062535 | -19.24        | 3.50          | 0.286  | -0.43         | 0.744  | 0.65          | 0.77        |
| ITGB3 | rs5918    | -22.45        | 3.88          | 0.543  | 1.50          | 0.45   | 0.07          | 0.99        |
| LTA   | rs1041981 | -20.22        | 1.10          | 0.663  | 0.40          | 0.745  | 2.71          | 0.17        |
| MMP1  | rs1799750 | -18.50        | 3.98          | 0.113  | -1.65         | 0.195  | 0.28          | 0.89        |
| MMP12 | rs652438  | -20.40        | 4.09          | 0.019  | 0.62          | 0.701  | 0.79          | 0.78        |
| MMP2  | rs243865  | -19.94        | 4.74          | 0.002  | -0.46         | 0.847  | -5.62         | 0.18        |
| MMP3  | rs3025058 | -24.80        | 7.82          | 0.194  | 2.83          | 0.132  | -2.14         | 0.51        |
| MMP9  | rs2664538 | -21.44        | 3.46          | 0.098  | 2.31          | 0.087  | 0.68          | 0.76        |
|       | rs2274756 | -16.29        | 4.77          | 0.306  | -2.20         | 0.192  | -0.39         | 0.88        |
| MTHFR | rs1801131 | -19.92        | 5.51          | 0.002  | -0.07         | 0.964  | -4.02         | 0.14        |

|               |            |        |        |       |       |       |       |             |
|---------------|------------|--------|--------|-------|-------|-------|-------|-------------|
| <i>NOS3</i>   | rs1799983  | -19.69 | 3.84   | 0.021 | -0.50 | 0.785 | 0.91  | 0.77        |
|               | rs1800779  | -19.67 | 4.49   | 0.007 | -0.48 | 0.782 | -1.62 | 0.58        |
| <i>NPPA</i>   | rs5065     | -17.11 | 3.30   | 0.253 | -2.22 | 0.078 | 0.68  | 0.75        |
|               | rs5063     | -16.27 | -12.23 | 0.223 | -1.88 | 0.475 | 8.51  | 0.10        |
| <i>PAII</i>   | rs7242     | -17.94 | 4.61   | 0.079 | -1.83 | 0.124 | -0.37 | 0.86        |
|               | rs1799768  | -21.91 | 2.66   | 0.474 | 1.40  | 0.286 | 0.95  | 0.68        |
| <i>PDE4D</i>  | rs27727    | -20.33 | 3.23   | 0.122 | 0.41  | 0.751 | 1.18  | 0.58        |
|               | rs40512    | -19.51 | 4.54   | 0.007 | -2.32 | 0.187 | -0.69 | 0.80        |
|               | rs702553   | -21.80 | 6.08   | 0.022 | 1.64  | 0.172 | -1.61 | 0.44        |
|               | rs12188950 | -23.56 | 13.10  | 0.038 | 1.95  | 0.349 | -4.92 | 0.15        |
|               | rs27653    | -18.85 | 1.48   | 0.665 | -0.84 | 0.543 | 1.93  | 0.38        |
|               | rs456009   | -20.71 | 5.55   | 0.004 | 0.90  | 0.508 | -2.12 | 0.34        |
| <i>PONI</i>   | rs705379   | -18.66 | 3.99   | 0.022 | -4.50 | 0.005 | 1.12  | 0.67        |
| <i>REN</i>    | rs6681776  | -19.63 | 2.20   | 0.21  | -0.99 | 0.51  | 5.67  | <b>0.04</b> |
|               | rs2368564  | -20.72 | 1.01   | 0.746 | 0.54  | 0.666 | 2.68  | 0.21        |
| <i>SCNN1A</i> | rs2228576  | -17.63 | -4.07  | 0.521 | -1.20 | 0.558 | 4.40  | 0.20        |
| <i>TNF</i>    | rs673      | -22.54 | 9.47   | 0.333 | 1.44  | 0.605 | -2.83 | 0.58        |
|               | rs1800629  | -23.93 | 6.22   | 0.261 | 2.37  | 0.19  | -1.23 | 0.69        |

coef., coefficient; val., value.

**Supplemental Table 3B.** Pharmacogenetic effects of 57 variants to diastolic blood pressure response comparing lisinopril vs. chlorthalidone.

| Gene         | SNP       | Intercept     | Drug          | SNP    |               | Drug*SNP |               |        |
|--------------|-----------|---------------|---------------|--------|---------------|----------|---------------|--------|
|              |           | $\beta$ coef. | $\beta$ coef. | p-val. | $\beta$ coef. | p-val.   | $\beta$ coef. | p-val. |
| <i>ACE</i>   | rs4363    | -9.89         | 2.15          | 0.122  | 0.43          | 0.583    | -1.07         | 0.42   |
|              | rs4291    | -10.13        | 1.36          | 0.299  | 0.75          | 0.329    | 0.08          | 0.95   |
|              | rs4343    | -9.62         | 2.19          | 0.065  | 0.19          | 0.819    | -1.78         | 0.24   |
| <i>ADD1</i>  | rs4961    | -9.57         | 1.49          | 0.129  | 0.21          | 0.891    | -1.17         | 0.63   |
| <i>ADRB2</i> | rs1042713 | -10.47        | 1.88          | 0.226  | 0.95          | 0.231    | -0.57         | 0.65   |
|              | rs1042714 | -9.83         | 1.22          | 0.273  | 0.81          | 0.433    | 0.11          | 0.94   |
| <i>AGT</i>   | rs5050    | -10.02        | 1.94          | 0.064  | 1.49          | 0.146    | -2.04         | 0.25   |
|              | rs5051    | -9.68         | 1.61          | 0.14   | 0.51          | 0.602    | -0.84         | 0.61   |
|              | rs699     | -9.78         | 1.33          | 0.226  | 0.73          | 0.45     | -0.01         | 0.99   |
| <i>AGTRI</i> | rs5186    | -9.42         | 1.55          | 0.122  | -0.50         | 0.718    | -0.89         | 0.67   |
|              | rs275653  | -11.81        | 4.27          | 0.084  | 1.56          | 0.082    | -2.02         | 0.19   |
| <i>APOB</i>  | rs676210  | -10.07        | 1.69          | 0.116  | 1.34          | 0.21     | -0.83         | 0.63   |
|              | rs1042031 | -11.54        | 0.93          | 0.754  | 1.17          | 0.287    | 0.28          | 0.87   |
| <i>F7</i>    | rs6046    | -11.93        | -1.18         | 0.747  | 1.38          | 0.207    | 1.24          | 0.53   |
|              | rs5742910 | -10.21        | 0.85          | 0.475  | 1.14          | 0.186    | 0.96          | 0.48   |
|              | rs7981123 | -10.31        | 1.06          | 0.37   | 1.35          | 0.136    | 0.43          | 0.75   |
|              | rs762637  | -10.16        | 1.95          | 0.06   | 1.85          | 0.07     | -1.95         | 0.27   |
| <i>F12</i>   | rs1801020 | -10.03        | 1.44          | 0.324  | 0.61          | 0.417    | -0.21         | 0.87   |
| <i>F13</i>   | rs5982    | -9.57         | 0.88          | 0.411  | 0.16          | 0.882    | 1.16          | 0.48   |

|               |            |        |       |       |       |       |       |      |
|---------------|------------|--------|-------|-------|-------|-------|-------|------|
|               | rs5985     | -9.52  | 1.52  | 0.163 | -0.06 | 0.955 | -0.62 | 0.71 |
| <i>FGB</i>    | rs1800790  | -13.04 | 2.37  | 0.644 | 1.85  | 0.281 | -0.53 | 0.84 |
| <i>GNAS</i>   | rs7121     | -8.33  | -1.56 | 0.501 | -0.83 | 0.328 | 1.95  | 0.18 |
| <i>GNB3</i>   | rs5443     | -8.87  | -1.27 | 0.57  | -0.49 | 0.578 | 1.85  | 0.20 |
|               | rs6065     | -10.05 | 0.97  | 0.399 | 1.15  | 0.227 | 0.46  | 0.76 |
| <i>GPIBA</i>  | rs4069688  | -9.13  | 0.85  | 0.429 | -1.10 | 0.293 | 1.24  | 0.46 |
|               | rs2243093  | -8.66  | 0.82  | 0.748 | -0.56 | 0.561 | 0.30  | 0.85 |
|               | rs1024323  | -8.91  | -1.60 | 0.34  | -0.49 | 0.536 | 2.60  | 0.05 |
| <i>GPRK2L</i> | rs1129292  | -9.37  | 1.15  | 0.282 | -0.51 | 0.638 | 0.59  | 0.73 |
|               | rs2960306  | -8.81  | -0.83 | 0.588 | -0.77 | 0.341 | 2.22  | 0.08 |
| <i>ITGA2</i>  | rs1062535  | -9.94  | 2.19  | 0.283 | 0.30  | 0.71  | -0.60 | 0.66 |
| <i>ITGB3</i>  | rs5918     | -9.67  | 0.17  | 0.967 | 0.07  | 0.955 | 0.66  | 0.76 |
| <i>LTA</i>    | rs1041981  | -9.72  | 1.01  | 0.519 | 0.18  | 0.818 | 0.24  | 0.85 |
| <i>MMP1</i>   | rs1799750  | -8.38  | 0.81  | 0.602 | -1.12 | 0.158 | 0.42  | 0.75 |
| <i>MMP12</i>  | rs652438   | -9.49  | 0.97  | 0.377 | -0.09 | 0.927 | 0.81  | 0.65 |
| <i>MMP2</i>   | rs243865   | -9.41  | 1.06  | 0.267 | -1.01 | 0.497 | 2.09  | 0.43 |
| <i>MMP3</i>   | rs3025058  | -10.61 | 2.08  | 0.579 | 0.60  | 0.607 | -0.43 | 0.83 |
|               | rs2664538  | -9.41  | -0.19 | 0.886 | -0.25 | 0.769 | 2.13  | 0.12 |
| <i>MMP9</i>   | rs2274756  | -9.70  | 4.82  | 0.098 | 0.10  | 0.921 | -2.12 | 0.21 |
| <i>MTHFR</i>  | rs1801131  | -9.53  | 1.93  | 0.057 | -0.05 | 0.968 | -2.56 | 0.19 |
|               | rs1799983  | -9.46  | 1.29  | 0.21  | -0.33 | 0.774 | 0.24  | 0.90 |
| <i>NOS3</i>   | rs1800779  | -9.25  | 2.11  | 0.04  | -0.98 | 0.363 | -2.97 | 0.10 |
|               | rs5065     | -8.14  | 0.39  | 0.826 | -1.15 | 0.143 | 0.85  | 0.51 |
| <i>NPPA</i>   | rs5063     | -8.94  | -8.15 | 0.191 | -0.32 | 0.845 | 4.94  | 0.13 |
|               | rs7242     | -8.99  | 3.18  | 0.051 | -0.55 | 0.461 | -1.63 | 0.20 |
| <i>PAII</i>   | rs1799768  | -10.26 | 1.66  | 0.473 | 0.47  | 0.565 | -0.20 | 0.89 |
|               | rs27727    | -8.93  | -0.05 | 0.97  | -0.82 | 0.312 | 1.87  | 0.17 |
|               | rs40512    | -9.48  | 2.09  | 0.046 | -0.42 | 0.705 | -2.31 | 0.18 |
| <i>PDE4D</i>  | rs702553   | -10.67 | 2.65  | 0.11  | 1.05  | 0.161 | -1.20 | 0.35 |
|               | rs12188950 | -8.04  | 2.40  | 0.542 | -0.82 | 0.53  | -0.62 | 0.77 |
|               | rs27653    | -9.90  | 3.02  | 0.158 | 0.27  | 0.756 | -1.22 | 0.37 |
|               | rs456009   | -9.35  | 0.68  | 0.58  | -0.38 | 0.652 | 1.23  | 0.37 |
| <i>PONI</i>   | rs705379   | -9.00  | 1.26  | 0.246 | -1.81 | 0.072 | 0.03  | 0.99 |
|               | rs6681776  | -9.49  | 3.98  | 0.173 | -0.02 | 0.982 | -1.66 | 0.32 |
| <i>REN</i>    | rs2368564  | -10.50 | 0.08  | 0.969 | 0.75  | 0.338 | 1.02  | 0.45 |
| <i>SCNN1A</i> | rs2228576  | -8.15  | -4.09 | 0.298 | -0.76 | 0.553 | 2.91  | 0.17 |
|               | rs673      | -12.28 | 7.83  | 0.197 | 1.44  | 0.402 | -3.40 | 0.28 |
| <i>TNF</i>    | rs1800629  | -10.59 | 2.52  | 0.464 | 0.60  | 0.592 | -0.68 | 0.72 |

coef., coefficient; val., value.

**Supplemental Table 3C.** Pharmacogenetic effects of 57 variants to systolic blood pressure response comparing amlodipine vs. chlorthalidone.

|  | Intercept | Drug | SNP | Drug*SNP |
|--|-----------|------|-----|----------|
|--|-----------|------|-----|----------|

| Gene          | SNP       | $\beta$ coef. | $\beta$ coef. | p-val. | $\beta$ coef. | p-val. | $\beta$ coef. | p-val.      |
|---------------|-----------|---------------|---------------|--------|---------------|--------|---------------|-------------|
|               | rs4363    | -20.01        | 5.49          | 0.014  | -0.02         | 0.99   | -2.41         | 0.22        |
| <i>ACE</i>    | rs4291    | -20.57        | 4.03          | 0.057  | 0.79          | 0.508  | -0.87         | 0.67        |
|               | rs4343    | -20.05        | 5.31          | 0.004  | 0.06          | 0.965  | -3.69         | 0.11        |
| <i>ADD1</i>   | rs4961    | -20.25        | 3.88          | 0.012  | 2.85          | 0.23   | -3.22         | 0.39        |
| <i>ADRB2</i>  | rs1042713 | -19.75        | 0.80          | 0.753  | -0.07         | 0.958  | 2.42          | 0.23        |
|               | rs1042714 | -19.26        | 2.70          | 0.117  | -1.56         | 0.329  | 1.90          | 0.45        |
|               | rs5050    | -19.96        | 4.10          | 0.012  | -0.29         | 0.857  | -2.23         | 0.42        |
| <i>AGT</i>    | rs5051    | -19.10        | 3.28          | 0.051  | -2.37         | 0.12   | 0.19          | 0.94        |
|               | rs699     | -19.17        | 3.01          | 0.08   | -1.43         | 0.341  | 0.74          | 0.77        |
| <i>AGTRI</i>  | rs5186    | -19.46        | 2.89          | 0.067  | -1.85         | 0.389  | 2.18          | 0.51        |
|               | rs275653  | -22.70        | 5.56          | 0.147  | 1.82          | 0.19   | -1.50         | 0.52        |
| <i>APOB</i>   | rs676210  | -20.67        | 3.10          | 0.066  | 1.15          | 0.484  | 1.81          | 0.50        |
|               | rs1042031 | -22.23        | 5.23          | 0.299  | 1.30          | 0.446  | -1.03         | 0.72        |
|               | rs6046    | -19.65        | 1.67          | 0.30   | -0.54         | 0.748  | 6.17          | <b>0.03</b> |
| <i>F7</i>     | rs5742910 | -21.78        | 4.66          | 0.018  | 3.30          | 0.014  | -2.22         | 0.30        |
|               | rs7981123 | -21.77        | 4.98          | 0.01   | 3.04          | 0.03   | -2.65         | 0.23        |
|               | rs762637  | -20.91        | 4.91          | 0.003  | 2.62          | 0.1    | -4.54         | 0.10        |
| <i>F12</i>    | rs1801020 | -20.04        | 2.66          | 0.236  | 0.03          | 0.982  | 0.79          | 0.69        |
| <i>F13</i>    | rs5982    | -19.41        | 3.69          | 0.027  | -2.13         | 0.188  | -0.52         | 0.84        |
|               | rs5985    | -20.36        | 3.65          | 0.038  | 0.98          | 0.543  | -0.37         | 0.88        |
| <i>FGB</i>    | rs1800790 | -20.92        | 5.08          | 0.511  | 0.59          | 0.826  | -0.90         | 0.82        |
| <i>GNAS</i>   | rs7121    | -19.61        | 3.81          | 0.287  | -0.11         | 0.935  | -0.31         | 0.89        |
| <i>GNB3</i>   | rs5443    | -18.80        | 2.31          | 0.544  | -0.72         | 0.596  | 0.77          | 0.75        |
|               | rs6065    | -20.94        | 3.84          | 0.034  | 2.03          | 0.17   | -0.81         | 0.74        |
| <i>GPIBA</i>  | rs4069688 | -19.33        | 3.45          | 0.045  | -1.90         | 0.238  | 0.04          | 0.99        |
|               | rs2243093 | -19.16        | 1.70          | 0.68   | -0.55         | 0.711  | 1.14          | 0.65        |
|               | rs1024323 | -21.67        | 4.96          | 0.07   | 1.75          | 0.155  | -1.70         | 0.41        |
| <i>GPRK2L</i> | rs1129292 | -20.08        | 4.43          | 0.008  | 0.31          | 0.854  | -3.15         | 0.25        |
|               | rs2960306 | -20.08        | 4.51          | 0.069  | -0.02         | 0.989  | -0.96         | 0.64        |
| <i>ITGA2</i>  | rs1062535 | -19.24        | 0.09          | 0.979  | -0.43         | 0.734  | 2.51          | 0.26        |
| <i>ITGB3</i>  | rs5918    | -22.45        | 7.32          | 0.227  | 1.50          | 0.434  | -2.22         | 0.50        |
| <i>LTA</i>    | rs1041981 | -20.22        | 2.58          | 0.291  | 0.40          | 0.737  | 0.78          | 0.69        |
| <i>MMP1</i>   | rs1799750 | -18.50        | 4.77          | 0.05   | -1.65         | 0.179  | -1.27         | 0.53        |
| <i>MMP12</i>  | rs652438  | -20.40        | 3.54          | 0.034  | 0.62          | 0.691  | 1.42          | 0.63        |
| <i>MMP2</i>   | rs243865  | -19.94        | 3.37          | 0.026  | -0.46         | 0.841  | 0.75          | 0.86        |
| <i>MMP3</i>   | rs3025058 | -24.80        | 7.86          | 0.159  | 2.83          | 0.117  | -2.48         | 0.42        |
|               | rs2664538 | -21.44        | 4.42          | 0.027  | 2.31          | 0.077  | -1.57         | 0.47        |
| <i>MMP9</i>   | rs2274756 | -16.29        | 2.05          | 0.664  | -2.20         | 0.177  | 0.81          | 0.77        |
| <i>MTHFR</i>  | rs1801131 | -19.92        | 3.56          | 0.041  | -0.07         | 0.963  | 0.01          | 0.99        |
|               | rs1799983 | -19.69        | 4.17          | 0.01   | -0.50         | 0.777  | -3.53         | 0.26        |
| <i>NOS3</i>   | rs1800779 | -19.67        | 2.75          | 0.109  | -0.48         | 0.774  | 1.60          | 0.55        |
|               | rs5065    | -17.11        | 2.16          | 0.443  | -2.22         | 0.068  | 0.98          | 0.63        |
| <i>NPPA</i>   | rs5063    | -16.27        | -1.84         | 0.819  | -1.88         | 0.46   | 2.78          | 0.51        |

|              |            |        |      |       |       |       |       |      |
|--------------|------------|--------|------|-------|-------|-------|-------|------|
| <i>PAII</i>  | rs7242     | -17.94 | 1.34 | 0.593 | -1.83 | 0.111 | 2.01  | 0.31 |
|              | rs1799768  | -21.91 | 2.42 | 0.481 | 1.40  | 0.268 | 0.73  | 0.73 |
| <i>PDE4D</i> | rs27727    | -20.33 | 3.20 | 0.127 | 0.41  | 0.743 | 0.44  | 0.83 |
|              | rs40512    | -19.51 | 2.75 | 0.096 | -2.32 | 0.172 | 3.18  | 0.23 |
|              | rs702553   | -21.80 | 5.31 | 0.059 | 1.64  | 0.157 | -1.64 | 0.43 |
|              | rs12188950 | -23.56 | 3.87 | 0.509 | 1.95  | 0.332 | -0.11 | 0.97 |
|              | rs27653    | -18.85 | 1.47 | 0.666 | -0.84 | 0.528 | 1.54  | 0.49 |
|              | rs456009   | -20.71 | 4.68 | 0.017 | 0.90  | 0.492 | -1.50 | 0.50 |
| <i>PONI</i>  | rs705379   | -18.66 | 2.75 | 0.099 | -4.50 | 0.004 | 2.90  | 0.26 |
| <i>REN</i>   | rs6681776  | -21.60 | 6.39 | 0.146 | 0.99  | 0.496 | -1.74 | 0.50 |
|              | rs2368564  | -20.72 | 2.77 | 0.338 | 0.54  | 0.654 | 0.68  | 0.73 |
| <i>SCN1A</i> | rs2228576  | -17.63 | 4.55 | 0.464 | -1.20 | 0.544 | -0.54 | 0.87 |
| <i>TNF</i>   | rs673      | -22.54 | 3.90 | 0.629 | 1.44  | 0.592 | -0.25 | 0.95 |
|              | rs1800629  | -23.93 | 1.02 | 0.862 | 2.37  | 0.174 | 1.29  | 0.69 |

coef., coefficient; val., value.

**Supplemental Table 3D.** Pharmacogenetic effects of 57 variants to diastolic blood pressure response comparing amlodipine vs. chlorthalidone.

| Gene         | SNP       | Intercept     |               |        | Drug          |        | SNP           |             | Drug*SNP |  |
|--------------|-----------|---------------|---------------|--------|---------------|--------|---------------|-------------|----------|--|
|              |           | $\beta$ coef. | $\beta$ coef. | p-val. | $\beta$ coef. | p-val. | $\beta$ coef. | p-val.      |          |  |
| <i>ACE</i>   | rs4363    | -9.89         | 1.53          | 0.273  | 0.43          | 0.571  | -0.98         | 0.43        |          |  |
|              | rs4291    | -10.13        | 0.93          | 0.482  | 0.75          | 0.315  | -0.19         | 0.88        |          |  |
|              | rs4343    | -9.62         | 1.63          | 0.157  | 0.19          | 0.814  | -1.98         | 0.17        |          |  |
| <i>ADD1</i>  | rs4961    | -9.57         | 0.53          | 0.583  | 0.21          | 0.888  | 1.35          | 0.56        |          |  |
| <i>ADRB2</i> | rs1042713 | -10.47        | 0.81          | 0.61   | 0.95          | 0.216  | -0.14         | 0.91        |          |  |
|              | rs1042714 | -9.83         | 1.67          | 0.121  | 0.81          | 0.417  | -2.39         | 0.12        |          |  |
| <i>AGT</i>   | rs5050    | -10.02        | 1.51          | 0.14   | 1.49          | 0.134  | -2.86         | 0.10        |          |  |
|              | rs5051    | -9.68         | 0.68          | 0.523  | 0.51          | 0.59   | -0.15         | 0.93        |          |  |
|              | rs699     | -9.78         | 0.44          | 0.678  | 0.73          | 0.434  | 0.69          | 0.66        |          |  |
| <i>AGTRI</i> | rs5186    | -9.42         | 0.37          | 0.709  | -0.50         | 0.709  | 1.33          | 0.52        |          |  |
|              | rs275653  | -8.69         | -1.14         | 0.32   | -1.56         | 0.072  | 3.44          | <b>0.02</b> |          |  |
| <i>APOB</i>  | rs676210  | -10.07        | 1.10          | 0.302  | 1.34          | 0.195  | -1.41         | 0.41        |          |  |
|              | rs1042031 | -11.54        | 2.20          | 0.486  | 1.17          | 0.272  | -0.89         | 0.62        |          |  |
| <i>F7</i>    | rs6046    | -9.17         | -0.53         | 0.6    | -1.38         | 0.192  | 4.63          | <b>0.01</b> |          |  |
|              | rs5742910 | -10.21        | 1.33          | 0.28   | 1.14          | 0.174  | -1.00         | 0.46        |          |  |
|              | rs7981123 | -10.30        | 1.75          | 0.15   | 1.35          | 0.12   | -1.87         | 0.18        |          |  |
|              | rs762637  | -10.16        | 1.52          | 0.14   | 1.85          | 0.07   | -2.71         | 0.12        |          |  |
| <i>F12</i>   | rs1801020 | -10.03        | 1.27          | 0.368  | 0.61          | 0.401  | -0.85         | 0.50        |          |  |
| <i>F13</i>   | rs5982    | -9.57         | 0.51          | 0.629  | 0.16          | 0.878  | 0.12          | 0.94        |          |  |
|              | rs5985    | -9.52         | 1.01          | 0.361  | -0.06         | 0.954  | -0.84         | 0.59        |          |  |
| <i>FGB</i>   | rs1800790 | -13.04        | 10.07         | 0.036  | 1.85          | 0.264  | -4.99         | 0.05        |          |  |
| <i>GNAS</i>  | rs7121    | -8.33         | 1.23          | 0.58   | -0.83         | 0.312  | -0.31         | 0.82        |          |  |
| <i>GNB3</i>  | rs5443    | -8.87         | -0.11         | 0.964  | -0.49         | 0.566  | 0.61          | 0.68        |          |  |

|               |            |        |       |       |       |       |        |      |
|---------------|------------|--------|-------|-------|-------|-------|--------|------|
|               | rs6065     | -10.05 | 1.38  | 0.224 | 1.15  | 0.214 | -1.70  | 0.26 |
| <i>GPIBA</i>  | rs4069688  | -9.13  | 0.33  | 0.757 | -1.10 | 0.277 | 0.87   | 0.61 |
|               | rs2243093  | -8.66  | 0.35  | 0.891 | -0.56 | 0.548 | 0.18   | 0.91 |
| <i>GPRK2L</i> | rs1024323  | -8.91  | 1.45  | 0.4   | -0.49 | 0.522 | -0.78  | 0.54 |
|               | rs1129292  | -9.37  | 0.57  | 0.583 | -0.51 | 0.627 | 0.27   | 0.87 |
|               | rs2960306  | -8.81  | 0.70  | 0.651 | -0.77 | 0.326 | 0.0001 | 0.99 |
| <i>ITGA2</i>  | rs1062535  | -9.94  | 1.11  | 0.586 | 0.30  | 0.701 | -0.28  | 0.84 |
| <i>ITGB3</i>  | rs5918     | -9.67  | -2.65 | 0.484 | 0.07  | 0.953 | 1.89   | 0.36 |
| <i>LTA</i>    | rs1041981  | -9.72  | 0.30  | 0.846 | 0.18  | 0.812 | 0.42   | 0.73 |
| <i>MMP1</i>   | rs1799750  | -8.38  | 0.58  | 0.7   | -1.12 | 0.143 | -0.08  | 0.95 |
| <i>MMP12</i>  | rs652438   | -9.49  | 0.93  | 0.376 | -0.09 | 0.925 | -1.25  | 0.50 |
| <i>MMP2</i>   | rs243865   | -9.41  | 0.23  | 0.804 | -1.01 | 0.483 | 4.00   | 0.13 |
| <i>MMP3</i>   | rs3025058  | -10.61 | 3.62  | 0.298 | 0.60  | 0.595 | -1.62  | 0.40 |
| <i>MMP9</i>   | rs2664538  | -9.41  | 0.31  | 0.802 | -0.25 | 0.762 | 0.58   | 0.67 |
|               | rs2274756  | -9.70  | 1.08  | 0.717 | 0.10  | 0.918 | -0.26  | 0.88 |
| <i>MTHFR</i>  | rs1801131  | -9.81  | 0.34  | 0.753 | 0.88  | 0.373 | 1.20   | 0.48 |
| <i>NOS3</i>   | rs1799983  | -9.46  | 0.63  | 0.529 | -0.33 | 0.767 | 0.44   | 0.82 |
|               | rs1800779  | -9.25  | 0.28  | 0.791 | -0.98 | 0.351 | 1.34   | 0.43 |
| <i>NPPA</i>   | rs5065     | -8.14  | -1.55 | 0.378 | -1.15 | 0.131 | 1.89   | 0.13 |
|               | rs5063     | -8.94  | 1.44  | 0.775 | -0.32 | 0.841 | -0.37  | 0.89 |
| <i>PAII</i>   | rs7242     | -8.99  | 0.62  | 0.693 | -0.55 | 0.448 | 0.13   | 0.91 |
|               | rs1799768  | -10.26 | 1.00  | 0.64  | 0.47  | 0.552 | -0.15  | 0.91 |
| <i>PDE4D</i>  | rs27727    | -8.93  | -1.00 | 0.445 | -0.82 | 0.295 | 2.08   | 0.11 |
|               | rs40512    | -9.48  | 0.54  | 0.606 | -0.42 | 0.697 | 0.51   | 0.76 |
|               | rs702553   | -10.67 | 2.63  | 0.136 | 1.05  | 0.148 | -1.74  | 0.18 |
|               | rs12188950 | -8.04  | 1.38  | 0.708 | -0.82 | 0.517 | -0.42  | 0.83 |
|               | rs27653    | -9.90  | 0.82  | 0.701 | 0.27  | 0.748 | -0.07  | 0.96 |
|               | rs456009   | -9.35  | 0.64  | 0.606 | -0.38 | 0.642 | 0.21   | 0.88 |
| <i>PONI</i>   | rs705379   | -9.00  | 0.02  | 0.982 | -1.81 | 0.064 | 2.10   | 0.20 |
| <i>REN</i>    | rs6681776  | -9.49  | -2.67 | 0.333 | -0.02 | 0.981 | 2.05   | 0.20 |
|               | rs2368564  | -10.50 | 1.97  | 0.28  | 0.75  | 0.323 | -1.01  | 0.42 |
| <i>SCN1A</i>  | rs2228576  | -8.15  | 0.34  | 0.93  | -0.76 | 0.54  | 0.21   | 0.92 |
| <i>TNF</i>    | rs673      | -12.28 | 5.76  | 0.253 | 1.44  | 0.387 | -2.66  | 0.31 |
|               | rs1800629  | -10.59 | -3.04 | 0.404 | 0.60  | 0.579 | 2.11   | 0.29 |

coef., coefficient; val., value.

**Supplemental Table 3E.** Pharmacogenetic effects of 57 variants to systolic blood pressure response comparing doxazosin vs. chlorthalidone.

| Gene       | SNP    | Intercept     | Drug          | SNP    |               | Drug*SNP |               |        |
|------------|--------|---------------|---------------|--------|---------------|----------|---------------|--------|
|            |        | $\beta$ coef. | $\beta$ coef. | p-val. | $\beta$ coef. | p-val.   | $\beta$ coef. | p-val. |
| <i>ACE</i> | rs4363 | -20.01        | 6.01          | 0.006  | -0.02         | 0.99     | -1.15         | 0.57   |
|            | rs4291 | -20.57        | 5.12          | 0.009  | 0.79          | 0.516    | -0.10         | 0.96   |
|            | rs4343 | -20.05        | 5.10          | 0.004  | 0.06          | 0.966    | 0.08          | 0.97   |

|               |           |        |       |        |       |       |       |             |
|---------------|-----------|--------|-------|--------|-------|-------|-------|-------------|
| <i>ADD1</i>   | rs4961    | -20.25 | 4.47  | 0.004  | 2.85  | 0.239 | 0.97  | 0.79        |
| <i>ADRB2</i>  | rs1042713 | -19.75 | 7.66  | 0.002  | -0.07 | 0.958 | -2.86 | 0.15        |
|               | rs1042714 | -19.26 | 5.18  | 0.003  | -1.56 | 0.337 | -0.68 | 0.78        |
| <i>AGT</i>    | rs5050    | -19.96 | 4.74  | 0.004  | -0.29 | 0.86  | 1.28  | 0.62        |
|               | rs5051    | -19.10 | 4.32  | 0.007  | -2.37 | 0.128 | 1.83  | 0.51        |
|               | rs699     | -19.17 | 4.28  | 0.009  | -1.43 | 0.35  | 0.68  | 0.80        |
| <i>AGTRI</i>  | rs5186    | -19.46 | 3.97  | 0.011  | -1.85 | 0.398 | 3.60  | 0.29        |
|               | rs275653  | -22.70 | 6.73  | 0.077  | 1.82  | 0.199 | -1.13 | 0.62        |
| <i>APOB</i>   | rs676210  | -20.67 | 5.53  | 0.001  | 1.15  | 0.493 | -0.85 | 0.76        |
|               | rs1042031 | -22.23 | 7.85  | 0.098  | 1.30  | 0.455 | -1.61 | 0.55        |
| <i>F7</i>     | rs6046    | -20.74 | 6.61  | 0.243  | 0.54  | 0.754 | -1.04 | 0.74        |
|               | rs5742910 | -21.78 | 5.62  | 0.004  | 3.30  | 0.015 | -1.45 | 0.52        |
|               | rs7981123 | -21.77 | 5.54  | 0.004  | 3.04  | 0.03  | -0.66 | 0.77        |
|               | rs762637  | -20.91 | 7.37  | 0.0001 | 2.62  | 0.11  | -6.46 | <b>0.01</b> |
| <i>F12</i>    | rs1801020 | -20.04 | 4.57  | 0.036  | 0.03  | 0.982 | 0.52  | 0.79        |
| <i>F13</i>    | rs5982    | -19.41 | 5.28  | 0.001  | -2.13 | 0.197 | 0.14  | 0.96        |
|               | rs5985    | -20.36 | 4.78  | 0.004  | 0.98  | 0.55  | 0.99  | 0.71        |
| <i>FGB</i>    | rs1800790 | -20.92 | -0.63 | 0.934  | 0.59  | 0.829 | 2.88  | 0.47        |
| <i>GNAS</i>   | rs7121    | -19.61 | 4.81  | 0.174  | -0.11 | 0.936 | -0.10 | 0.96        |
| <i>GNB3</i>   | rs5443    | -18.80 | 2.19  | 0.524  | -0.72 | 0.601 | 1.90  | 0.39        |
|               | rs6065    | -20.94 | 5.96  | 0.001  | 2.03  | 0.179 | -1.81 | 0.45        |
| <i>GPIBA</i>  | rs4069688 | -19.33 | 5.07  | 0.003  | -1.90 | 0.248 | 0.18  | 0.95        |
|               | rs2243093 | -19.16 | 2.70  | 0.497  | -0.55 | 0.717 | 1.55  | 0.52        |
| <i>GPRK2L</i> | rs1024323 | -21.67 | 7.38  | 0.004  | 1.75  | 0.163 | -2.26 | 0.25        |
|               | rs1129292 | -20.08 | 4.97  | 0.002  | 0.31  | 0.858 | 0.38  | 0.89        |
|               | rs2960306 | -20.08 | 5.78  | 0.013  | -0.02 | 0.989 | -0.64 | 0.75        |
| <i>ITGA2</i>  | rs1062535 | -19.24 | 2.08  | 0.5    | -0.43 | 0.739 | 1.98  | 0.34        |
| <i>ITGB3</i>  | rs5918    | -22.45 | 0.30  | 0.963  | 1.50  | 0.442 | 2.32  | 0.50        |
| <i>LTA</i>    | rs1041981 | -20.22 | 4.23  | 0.078  | 0.40  | 0.742 | 0.49  | 0.80        |
| <i>MMP1</i>   | rs1799750 | -18.50 | 4.94  | 0.034  | -1.65 | 0.188 | 0.32  | 0.87        |
| <i>MMP12</i>  | rs652438  | -20.40 | 6.49  | 0      | 0.62  | 0.697 | -3.07 | 0.22        |
| <i>MMP2</i>   | rs243865  | -19.94 | 4.65  | 0.002  | -0.46 | 0.845 | 3.63  | 0.37        |
| <i>MMP3</i>   | rs3025058 | -24.80 | 6.09  | 0.25   | 2.83  | 0.123 | -0.70 | 0.81        |
| <i>MMP9</i>   | rs2664538 | -21.44 | 4.79  | 0.018  | 2.31  | 0.083 | 0.17  | 0.94        |
|               | rs2274756 | -16.29 | 5.10  | 0.258  | -2.20 | 0.186 | -0.09 | 0.97        |
| <i>MTHFR</i>  | rs1801131 | -19.92 | 4.28  | 0.012  | -0.07 | 0.964 | 0.85  | 0.75        |
| <i>NOS3</i>   | rs1799983 | -19.69 | 4.62  | 0.003  | -0.50 | 0.782 | 0.31  | 0.92        |
|               | rs1800779 | -19.67 | 4.19  | 0.011  | -0.48 | 0.778 | 1.57  | 0.54        |
| <i>NPPA</i>   | rs5065    | -17.11 | 2.85  | 0.318  | -2.22 | 0.074 | 1.51  | 0.46        |
|               | rs5063    | -16.27 | 3.70  | 0.649  | -1.88 | 0.468 | 0.54  | 0.90        |
| <i>PAII</i>   | rs7242    | -17.94 | 4.02  | 0.101  | -1.83 | 0.118 | 0.73  | 0.70        |
|               | rs1799768 | -21.91 | 5.32  | 0.121  | 1.40  | 0.277 | -0.35 | 0.87        |
| <i>PDE4D</i>  | rs27727   | -20.33 | 4.50  | 0.031  | 0.41  | 0.748 | 1.00  | 0.63        |
|               | rs40512   | -19.51 | 4.43  | 0.006  | -2.32 | 0.178 | 2.46  | 0.36        |
|               | rs702553  | -21.80 | 7.25  | 0.006  | 1.64  | 0.165 | -2.02 | 0.30        |

|              |            |        |       |       |       |       |       |             |
|--------------|------------|--------|-------|-------|-------|-------|-------|-------------|
|              | rs12188950 | -23.56 | -0.78 | 0.904 | 1.95  | 0.341 | 3.22  | 0.36        |
|              | rs27653    | -18.85 | 2.26  | 0.491 | -0.84 | 0.536 | 2.04  | 0.34        |
|              | rs456009   | -20.71 | 6.39  | 0.001 | 0.90  | 0.501 | -2.00 | 0.34        |
| <i>PONI</i>  | rs705379   | -18.66 | 3.62  | 0.028 | -4.50 | 0.005 | 5.09  | 0.05        |
| <i>REN</i>   | rs6681776  | -19.63 | 2.66  | 0.12  | -0.99 | 0.503 | 5.87  | <b>0.02</b> |
|              | rs2368564  | -20.72 | 2.32  | 0.416 | 0.54  | 0.66  | 2.19  | 0.26        |
| <i>SCN1A</i> | rs2228576  | -17.63 | -1.21 | 0.856 | -1.20 | 0.551 | 3.21  | 0.37        |
| <i>TNF</i>   | rs673      | -22.54 | 4.25  | 0.611 | 1.44  | 0.599 | 0.26  | 0.95        |
|              | rs1800629  | -23.93 | 9.39  | 0.076 | 2.37  | 0.183 | -2.70 | 0.36        |

coef., coefficient; val., value.

**Supplemental Table 3F.** Pharmacogenetic effects of 57 variants to diastolic blood pressure response comparing doxazosin vs. chlorthalidone.

| Gene          | SNP       | Intercept     | Drug          | SNP    |               | Drug*SNP |               |             |
|---------------|-----------|---------------|---------------|--------|---------------|----------|---------------|-------------|
|               |           | $\beta$ coef. | $\beta$ coef. | p-val. | $\beta$ coef. | p-val.   | $\beta$ coef. | p-val.      |
| <i>ACE</i>    | rs4363    | -9.89         | 2.92          | 0.031  | 0.43          | 0.578    | -2.20         | 0.09        |
|               | rs4291    | -10.13        | 0.94          | 0.446  | 0.75          | 0.323    | 0.50          | 0.69        |
|               | rs4343    | -9.62         | 1.53          | 0.172  | 0.19          | 0.817    | -0.63         | 0.66        |
| <i>ADD1</i>   | rs4961    | -9.57         | 1.03          | 0.288  | 0.21          | 0.89     | 1.10          | 0.62        |
| <i>ADRB2</i>  | rs1042713 | -10.47        | 2.45          | 0.113  | 0.95          | 0.226    | -1.22         | 0.33        |
|               | rs1042714 | -9.83         | 1.35          | 0.209  | 0.81          | 0.428    | -0.39         | 0.80        |
| <i>AGT</i>    | rs5050    | -10.02        | 1.42          | 0.164  | 1.49          | 0.142    | -0.55         | 0.74        |
|               | rs5051    | -9.68         | 1.63          | 0.106  | 0.51          | 0.598    | -1.52         | 0.38        |
|               | rs699     | -9.78         | 1.69          | 0.099  | 0.73          | 0.446    | -1.31         | 0.45        |
| <i>AGTR1</i>  | rs5186    | -9.42         | 1.25          | 0.197  | -0.50         | 0.716    | 0.12          | 0.96        |
|               | rs275653  | -11.81        | 3.82          | 0.108  | 1.56          | 0.079    | -1.72         | 0.23        |
| <i>APOB</i>   | rs676210  | -10.07        | 1.79          | 0.082  | 1.34          | 0.205    | -1.47         | 0.41        |
|               | rs1042031 | -11.54        | 2.85          | 0.339  | 1.17          | 0.282    | -0.92         | 0.59        |
| <i>F7</i>     | rs6046    | -11.93        | 7.93          | 0.025  | 1.38          | 0.204    | -3.78         | 0.05        |
|               | rs5742910 | -10.21        | 1.50          | 0.214  | 1.14          | 0.184    | -0.32         | 0.82        |
|               | rs7981123 | -10.31        | 1.43          | 0.23   | 1.35          | 0.12     | -0.32         | 0.82        |
|               | rs762637  | -10.16        | 2.10          | 0.04   | 1.85          | 0.07     | -2.53         | 0.11        |
| <i>F12</i>    | rs1801020 | -10.03        | 1.34          | 0.325  | 0.61          | 0.411    | -0.25         | 0.84        |
| <i>F13</i>    | rs5982    | -9.57         | 1.72          | 0.098  | 0.16          | 0.881    | -1.34         | 0.40        |
|               | rs5985    | -9.52         | -0.03         | 0.977  | -0.06         | 0.954    | 3.65          | <b>0.03</b> |
| <i>FGB</i>    | rs1800790 | -13.04        | 3.55          | 0.458  | 1.85          | 0.276    | -1.18         | 0.64        |
| <i>GNAS</i>   | rs7121    | -8.33         | 0.03          | 0.989  | -0.83         | 0.324    | 0.87          | 0.53        |
| <i>GNB3</i>   | rs5443    | -8.87         | -0.96         | 0.654  | -0.49         | 0.572    | 1.63          | 0.23        |
|               | rs6065    | -10.05        | 1.58          | 0.142  | 1.15          | 0.223    | -0.70         | 0.64        |
| <i>GPIBA</i>  | rs4069688 | -9.13         | 0.77          | 0.471  | -1.10         | 0.287    | 1.28          | 0.44        |
|               | rs2243093 | -8.66         | -1.14         | 0.646  | -0.56         | 0.556    | 1.52          | 0.31        |
| <i>GPRK2L</i> | rs1024323 | -8.91         | 1.59          | 0.329  | -0.49         | 0.53     | -0.32         | 0.80        |
|               | rs1129292 | -9.37         | 1.42          | 0.157  | -0.51         | 0.634    | -0.58         | 0.73        |



|              |            |        |       |       |       |       |       |              |
|--------------|------------|--------|-------|-------|-------|-------|-------|--------------|
|              | rs2960306  | -8.81  | 1.42  | 0.332 | -0.77 | 0.336 | -0.24 | 0.85         |
| <i>ITGA2</i> | rs1062535  | -9.94  | 1.50  | 0.437 | 0.30  | 0.708 | -0.14 | 0.91         |
| <i>ITGB3</i> | rs5918     | -9.67  | -0.55 | 0.893 | 0.07  | 0.954 | 0.99  | 0.65         |
| <i>LTA</i>   | rs1041981  | -9.72  | 0.70  | 0.644 | 0.18  | 0.816 | 0.61  | 0.62         |
| <i>MMP1</i>  | rs1799750  | -8.38  | -0.36 | 0.807 | -1.12 | 0.152 | 1.65  | 0.17         |
| <i>MMP12</i> | rs652438   | -9.49  | 1.87  | 0.079 | -0.09 | 0.926 | -1.59 | 0.31         |
| <i>MMP2</i>  | rs243865   | -9.41  | 0.97  | 0.303 | -1.01 | 0.492 | 2.17  | 0.39         |
| <i>MMP3</i>  | rs3025058  | -9.41  | 2.36  | 0.02  | -0.60 | 0.60  | -4.17 | <b>0.02</b>  |
| <i>MMP9</i>  | rs2664538  | -9.41  | -0.01 | 0.991 | -0.25 | 0.767 | 1.84  | 0.17         |
|              | rs2274756  | -9.70  | 3.84  | 0.174 | 0.10  | 0.92  | -1.59 | 0.33         |
| <i>MTHFR</i> | rs1801131  | -9.81  | 1.45  | 0.178 | 0.88  | 0.385 | -0.68 | 0.68         |
| <i>NOS3</i>  | rs1799983  | -9.46  | 1.27  | 0.196 | -0.33 | 0.772 | 0.03  | 0.99         |
|              | rs1800779  | -9.25  | 0.69  | 0.503 | -0.98 | 0.362 | 1.90  | 0.24         |
| <i>NPPA</i>  | rs5065     | -8.14  | 0.01  | 0.996 | -1.15 | 0.141 | 1.06  | 0.41         |
|              | rs5063     | -8.94  | 3.50  | 0.492 | -0.32 | 0.844 | -1.17 | 0.66         |
| <i>PAII</i>  | rs7242     | -8.99  | 1.95  | 0.205 | -0.55 | 0.458 | -0.57 | 0.63         |
|              | rs1799768  | -10.26 | -0.19 | 0.929 | 0.47  | 0.56  | 1.08  | 0.43         |
| <i>PDE4D</i> | rs27727    | -8.93  | -0.23 | 0.86  | -0.82 | 0.304 | 1.77  | 0.17         |
|              | rs40512    | -9.48  | 1.22  | 0.235 | -0.42 | 0.702 | 0.21  | 0.90         |
|              | rs702553   | -10.67 | 2.46  | 0.136 | 1.05  | 0.156 | -1.13 | 0.36         |
|              | rs12188950 | -8.04  | -1.24 | 0.763 | -0.82 | 0.526 | 1.35  | 0.54         |
|              | rs27653    | -9.90  | -0.25 | 0.903 | 0.27  | 0.753 | 1.06  | 0.43         |
|              | rs456009   | -9.35  | 1.78  | 0.134 | -0.38 | 0.648 | -0.94 | 0.48         |
| <i>PONI</i>  | rs705379   | -9.00  | 1.13  | 0.273 | -1.81 | 0.069 | 0.68  | 0.68         |
| <i>REN</i>   | rs6681776  | -9.53  | -0.46 | 0.672 | 0.02  | 0.981 | 4.13  | <b>0.007</b> |
|              | rs2368564  | -10.50 | -1.53 | 0.387 | 0.75  | 0.329 | 2.16  | 0.07         |
| <i>SCN1A</i> | rs2228576  | -8.15  | 3.71  | 0.375 | -0.76 | 0.55  | -1.36 | 0.54         |
| <i>TNF</i>   | rs673      | -12.28 | 6.26  | 0.23  | 1.44  | 0.398 | -2.66 | 0.33         |
|              | rs1800629  | -10.59 | 1.00  | 0.763 | 0.60  | 0.588 | 0.14  | 0.94         |

coef., coefficient; val., value.
